# Supplementary material for: Assessing Advantages and Drawbacks of Rapidly Generated Ultra-Large 3D Breast Cancer Spheroids: Studies with Chemotherapeutics and Nanoparticles
Source: MDPI journal article supplement (doi:10.3390/ijms21124413), 2020-06-21
Supplement: s1 [file s1]

## MCF-7 Small Spheroids, Area Difference

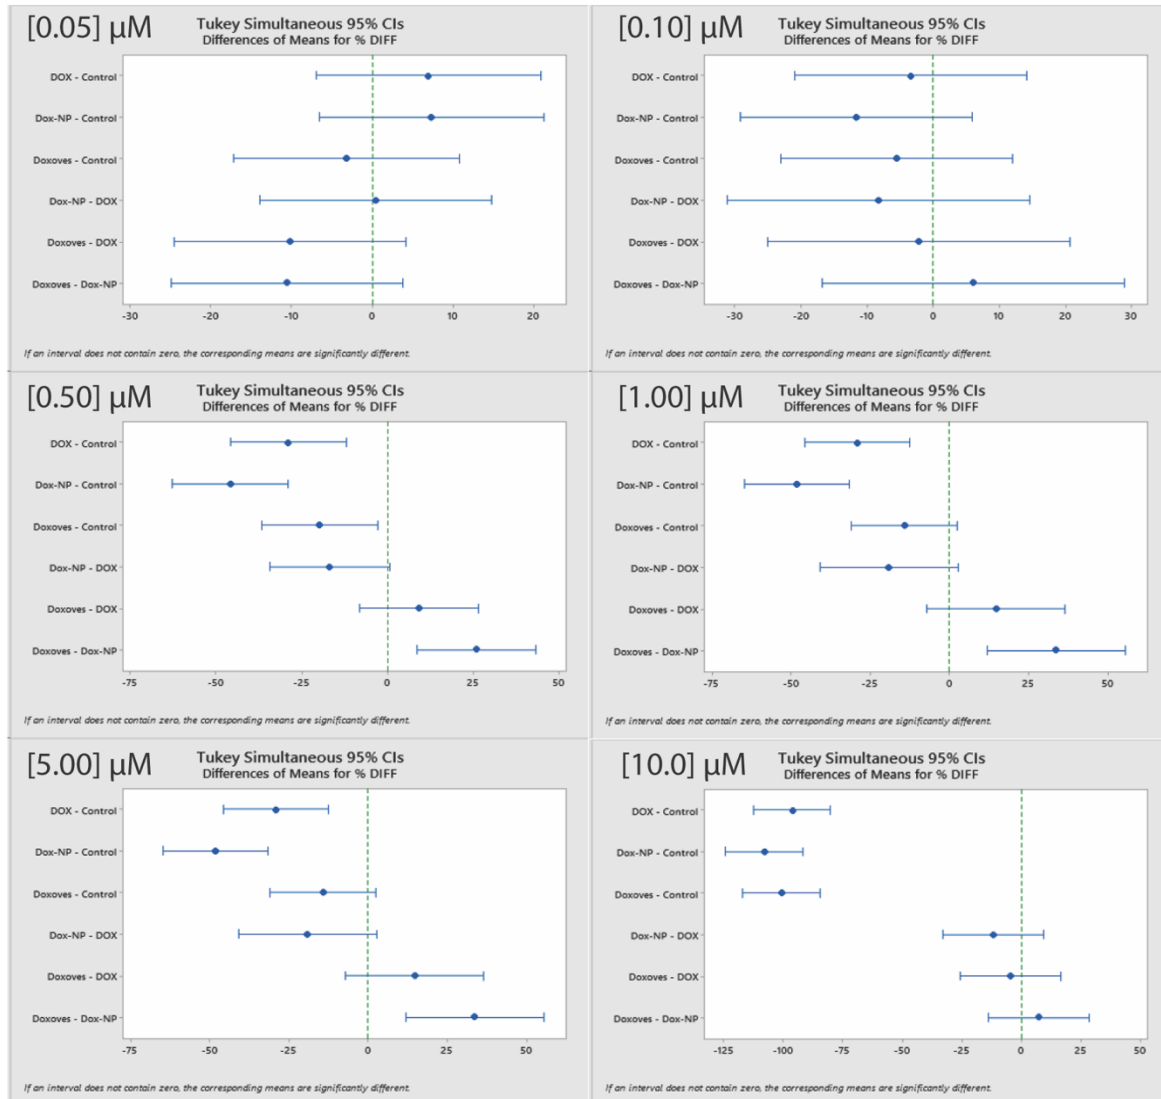

**Figure S1.** Tukey statistical analysis of change in area of MCF-7 small spheroids at varied treatment concentrations.

## MCF-7 Small Spheroids, Cell Viability

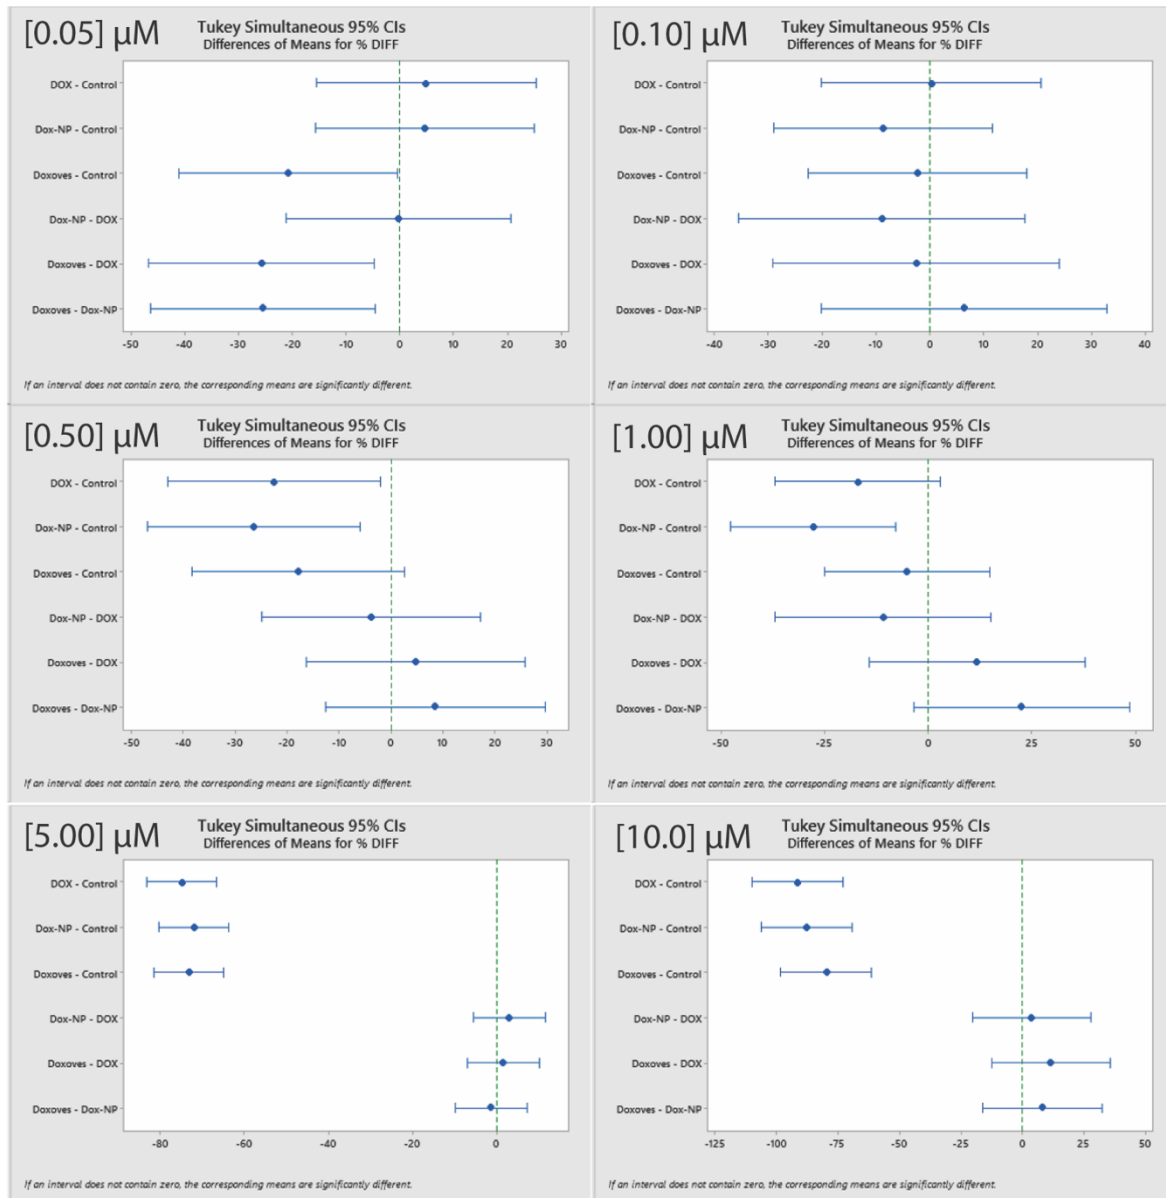

**Figure S2.** Tukey statistical analysis of cell viability of MCF-7 small spheroids at varied treatment concentrations.

## MCF-7 Ultra-large Spheroids Cell Viability

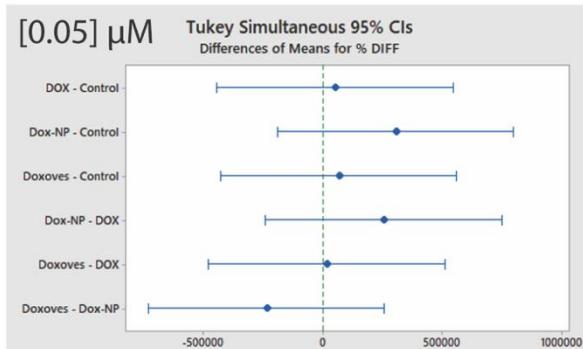

If an interval does not contain zero, the corresponding means are significantly different.

## MDA-MB-231 Ultra-large Spheroids Cell Viability

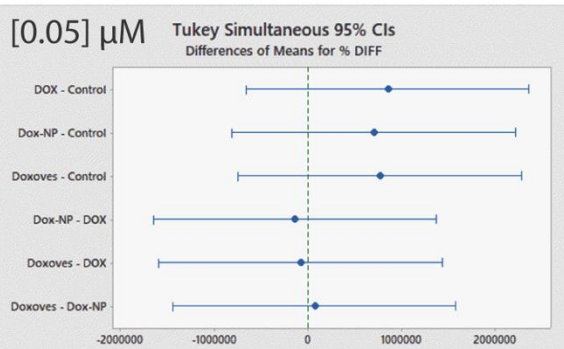

If an interval does not contain zero, the corresponding means are significantly different.

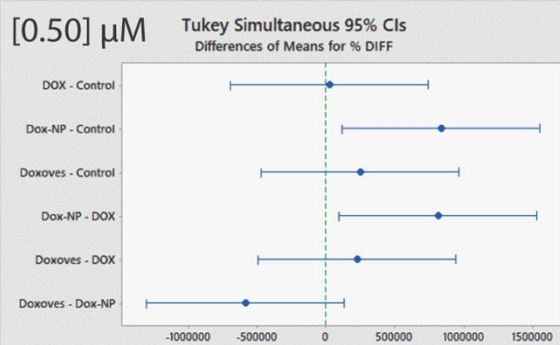

If an interval does not contain zero, the corresponding means are significantly different.

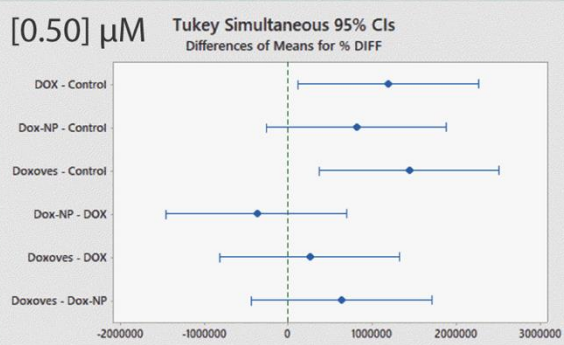

If an interval does not contain zero, the corresponding means are significantly different.

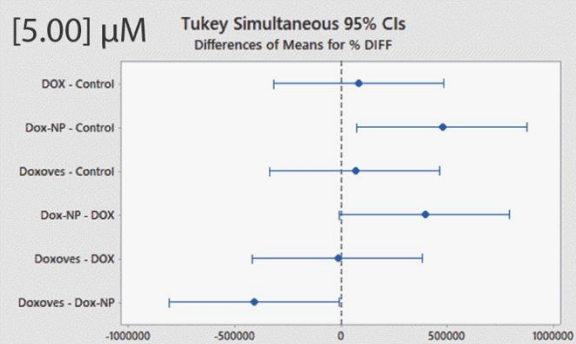

If an interval does not contain zero, the corresponding means are significantly different.

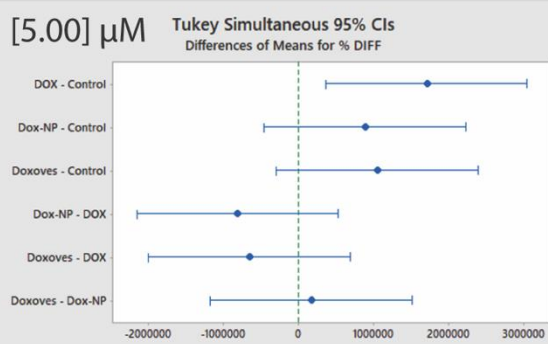

If an interval does not contain zero, the corresponding means are significantly different.

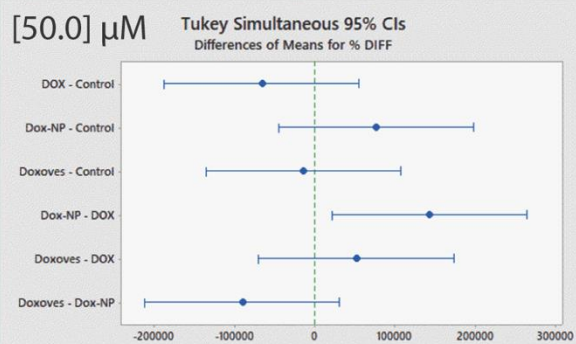

If an interval does not contain zero, the corresponding means are significantly different.

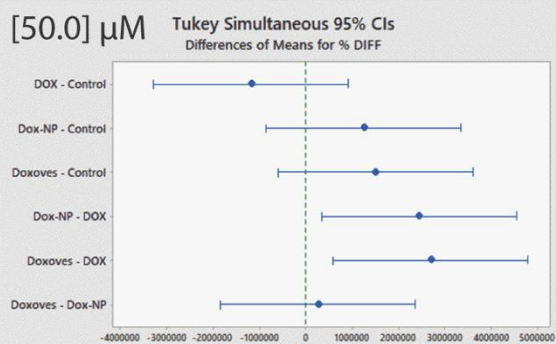

If an interval does not contain zero, the corresponding means are significantly different.

**Figure S3.** Tukey statistical analysis of cell viability of MCF-7 and MDA-MB-231 ultra-large spheroids.
